# Supplementary material
Source: publisher figshare collection journal article supplement (https://karger.figshare.com/ndownloader/files/36405363)
Supplement: Supplementary file 1 [file 36405363]

**Supplementary Table1.** Results of the Mann–Whitney *U* test for differences in iCoh values between responders and non-responders**in beta bands**

| HAM-D scores for responders vs. non-responders | | | | | | |
| --- | --- | --- | --- | --- | --- | --- |
|  | iCoh→ | | *U* | *Z* | *r* | p |
| Beta 1 | rACC | l-AI | 122 | 2.464 | 0.49 | 0.013 |
|  | rACC | r-AI | 109 | 1.752 | 0.35 | 0.085 |
|  | l-AI | rACC | 54 | –1.259 | –0.25 | 0.222 |
|  | r-AI | rACC | 105 | 1.533 | 0.31 | 0.134 |
| Beta 2 | rACC | l-AI | 117 | 2.190 | 0.44 | 0.029 |
|  | rACC | r-AI | 97 | 1.095 | 0.22 | 0.291 |
|  | l-AI | rACC | 54 | –1.259 | –0.25 | 0.222 |
|  | r-AI | rACC | 92 | 0.821 | 0.16 | 0.434 |

rACC: rostral anterior cingulate cortex, l-AI: left anterior insula, r-AI: right anterior insula
